# Supplementary material
Source: MDPI journal article supplement (https://www.mdpi.com/2073-445X/12/9/1782)
Supplement: s1 [file s1]

### Supplementary Materials:

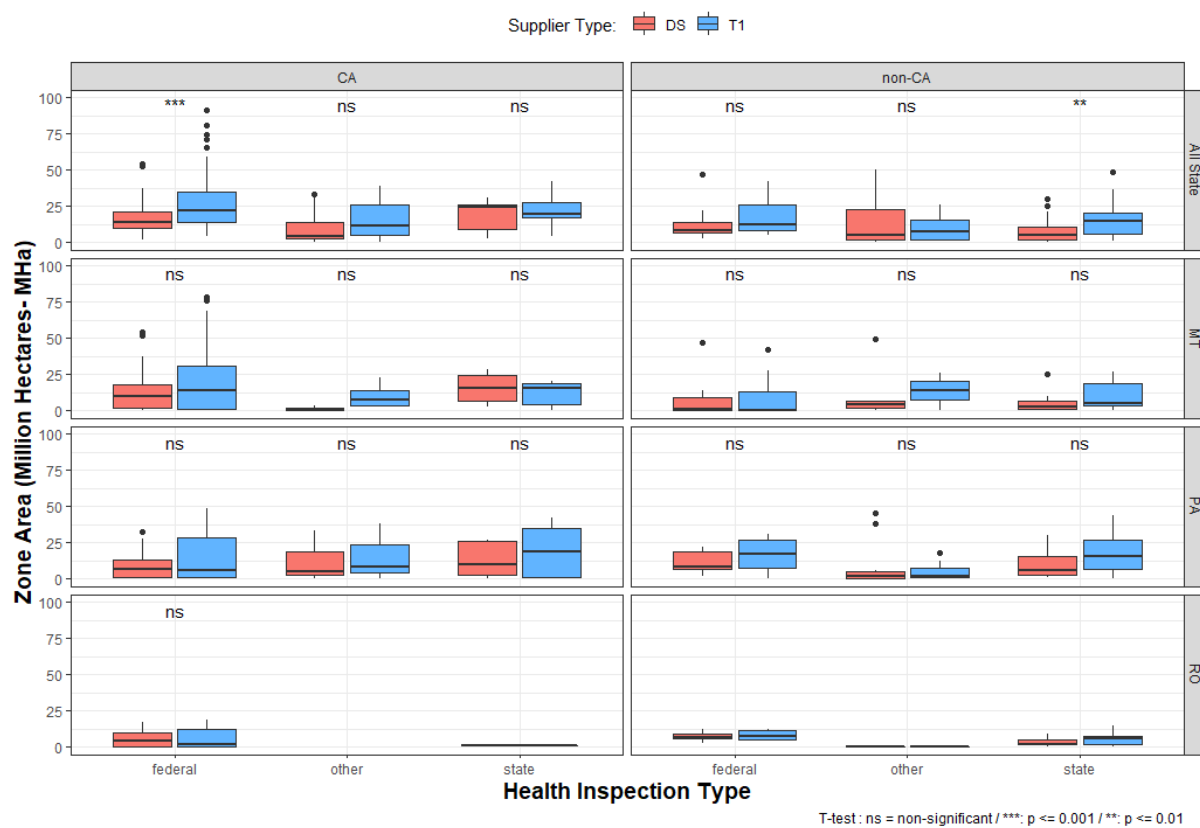

**Figure S1.** Boxplot showing the supply zone areas per health inspection type, per CA, per state for direct (red) and tier-1 indirect (blue) suppliers.

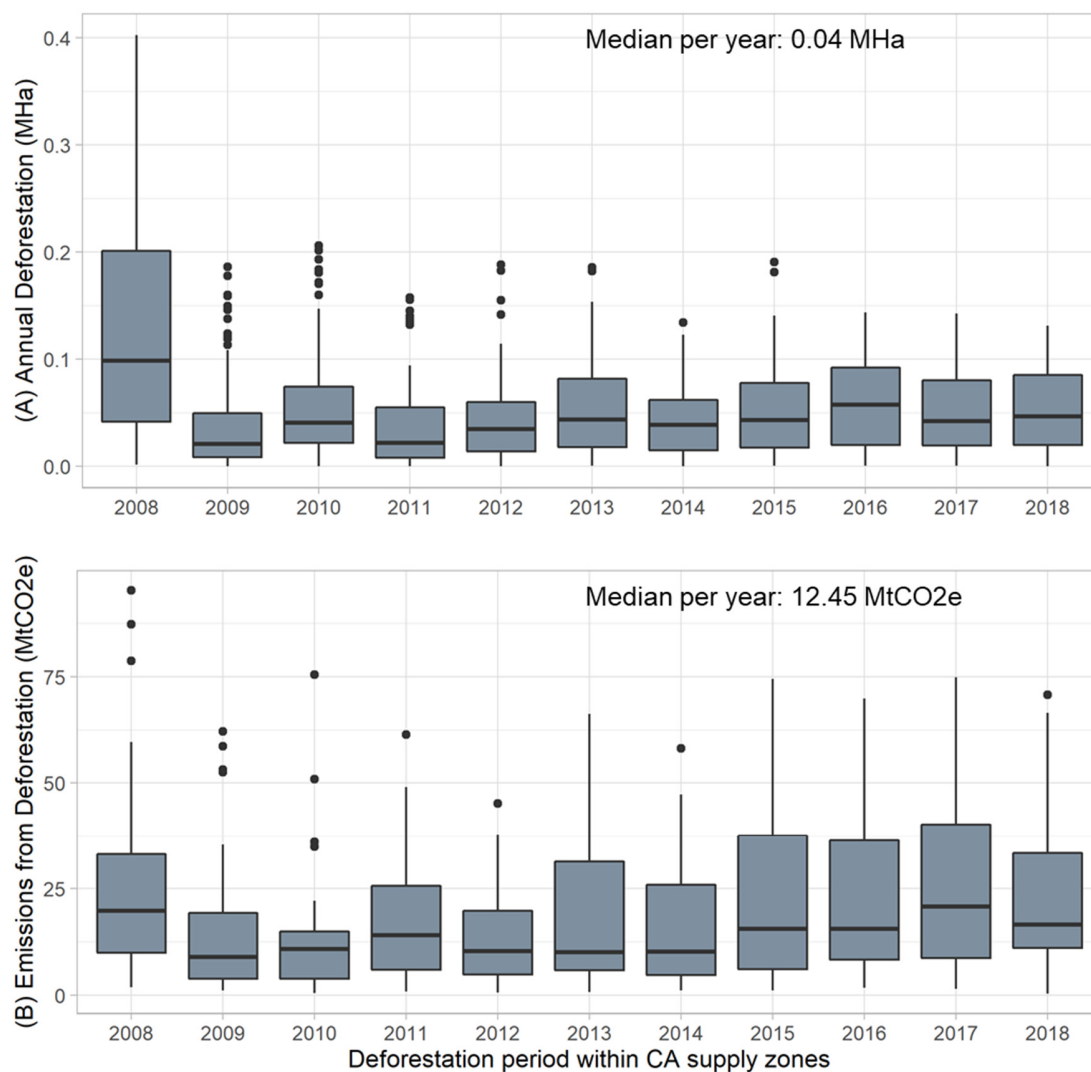

**Figure S2.** Boxplot showing the annual deforestation (A) and associated carbon emissions (B) within the CA supply zones.

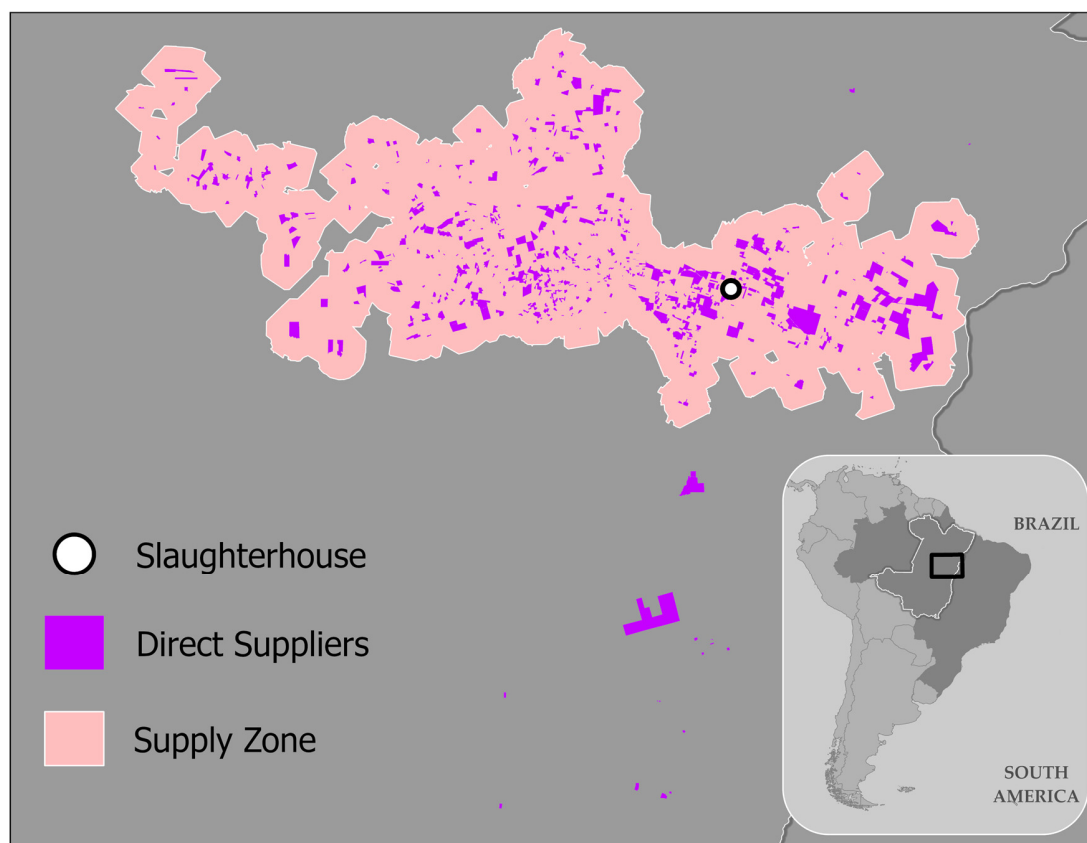

**Figure S3.** Example of a supply zone drawn from the direct suppliers of a single slaughterhouse.

**Table S1.** Total number of cattle heads moved for various purposes using GTAs in Pará, Mato Grosso, and Rondônia, for the period from 2013 to 2018.

| Purposes                             | Cattle moved using GTA in Pará, Mato Grosso, and Rondônia between the years 2013 and 2018 |               |
|--------------------------------------|-------------------------------------------------------------------------------------------|---------------|
|                                      | Total Heads                                                                               | % Total Heads |
| <b>Non-Slaughter</b>                 | <b>175,726,735</b>                                                                        | <b>75%</b>    |
| Engorda                              | 136,037,280                                                                               | 58%           |
| Reproducao                           | 31,591,942                                                                                | 14%           |
| Quarentena                           | 2,348,062                                                                                 | 1%            |
| Exportacao                           | 2,092,897                                                                                 | 1%            |
| Leilao                               | 2,064,279                                                                                 | 1%            |
| Retorno de aglomeracao               | 792,163                                                                                   | 0%            |
| Esporte                              | 243,935                                                                                   | 0%            |
| Cria                                 | 202,290                                                                                   | 0%            |
| Aglomeracao com finalidade comercial | 197,087                                                                                   | 0%            |
| Exposicao                            | 57,308                                                                                    | 0%            |

| Purposes                             | Cattle moved using GTA in Pará, Mato Grosso, and Rondônia between the years 2013 and 2018 |               |
|--------------------------------------|-------------------------------------------------------------------------------------------|---------------|
|                                      | Total Heads                                                                               | % Total Heads |
| Pesagem                              | 22,378                                                                                    | 0%            |
| Recria                               | 22,348                                                                                    | 0%            |
| Retorno de abatedouro                | 11,339                                                                                    | 0%            |
| Atendimento veterinario              | 9,175                                                                                     | 0%            |
| Outras                               | 7,898                                                                                     | 0%            |
| Lazer                                | 7,823                                                                                     | 0%            |
| Servico                              | 6,223                                                                                     | 0%            |
| Cria/engorda                         | 5,129                                                                                     | 0%            |
| Destruicao                           | 2,873                                                                                     | 0%            |
| Feira                                | 1,357                                                                                     | 0%            |
| Trabalho                             | 994                                                                                       | 0%            |
| Aglomeracao sem finalidade comercial | 811                                                                                       | 0%            |
| Saída de abatedouro/frigorífico      | 676                                                                                       | 0%            |
| Cria/reproducao                      | 345                                                                                       | 0%            |
| Comercializacao                      | 82                                                                                        | 0%            |
| Pesquisa                             | 21                                                                                        | 0%            |
| Sacrificio                           | 10                                                                                        | 0%            |
| Equoterapia                          | 7                                                                                         | 0%            |
| Postura                              | 3                                                                                         | 0%            |
| <b>Slaughter</b>                     | <b>57,182,002</b>                                                                         | <b>25%</b>    |
| Abate                                | 57,181,510                                                                                | 25%           |
| Abate Sanitario                      | 492                                                                                       | 0%            |
| <b>Total</b>                         | <b>232,908,737</b>                                                                        | <b>100%</b>   |
